# Supplementary material for: A tunable assay for modulators of genome-destabilizing DNA structures
Source: PubMed Central journal article supplement — Nucleic Acids Res. 2019 Apr 5;47(13):e73. doi: 10.1093/nar/gkz237 (PMC6648359; doi:10.1093/nar/gkz237), 2019-04-05

**Table S1. Oligonucleotides used in this study.** Blue and red denote nucleotides involved in Watson-Crick and reverse Hoogsteen base pairing, respectively.

| Name  | Sequence (5' - 3')                                     | $\epsilon$ ( $\times 10^3$ , $M^{-1}cm^{-1}$ ) |
|-------|--------------------------------------------------------|------------------------------------------------|
| R2    | CCCCTCCC TTTT GGGAGGGG CGCTTAT GGGGAGGG                | 366.0                                          |
| R2FQ  | CCCCTCCC TT-FAMdT-TT GGGAGGGG CGCTTAT GGGGAGGG-BHQ1    | 404.1                                          |
| MCRa2 | CCCTCCCC ATAAGCG CCCCTCCC AAAAA                        | 282.1                                          |
| GT    | GGGG TTTT GGGG TTTT GGGG AAAA GGGG TTTT CCCC TTTT CCCC | 446.4                                          |

**Table S2-1. List of 320 chemical compounds.** Purity data was obtained using an HPLC equipped with UV detector from the specific batch indicated. NA indicated data was not available because they do not absorb UV. Further details can be found at <https://www.selleckchem.com/>.

| Compound ID                   | CAS Number   | Targets                     | Selleck Cat No | Batch   | Purity, % |
|-------------------------------|--------------|-----------------------------|----------------|---------|-----------|
| ABT-263 (Navitoclax)          | 923564-51-6  | Bcl-2                       | S1001          | S100101 | 99.33     |
| Entinostat (MS-275)           | 209783-80-2  | HDAC                        | S1053          | S105301 | 99.11     |
| PCI-24781 (Abexinostat)       | 783355-60-2  | HDAC                        | S1090          | S109001 | 92.77     |
| Mocetinostat (MGCD0103)       | 726169-73-9  | HDAC                        | S1122          | S112202 | 99.04     |
| S31-201                       | 501919-59-1  | STAT                        | S1155          | S115501 | 94.4      |
| MK-2866 (GTX-024)             | 841205-47-8  | Androgen Receptor           | S1174          | S117401 | 99.36     |
| Finasteride                   | 98319-26-7   | 5-alpha Reductase           | S1197          | S119701 | 99.27     |
| Epothilone A                  | 152044-53-6  | Microtubule Associated      | S1297          | S129701 | 99.1      |
| Pirarubicin                   | 72496-41-4   | Topoisomerase               | S1393          | S139301 | 99.09     |
| Calcitriol                    | 32222-06-3   | Others                      | S1466          | S146601 | 99.1      |
| Veliparib (ABT-888)           | 912444-00-9  | PARP                        | S1004          | S100401 | 99.74     |
| Obatoclox Mesylate            | 803712-79-0  | Bcl-2, Autophagy            | S1057          | S105701 | 99.25     |
| LAQ824 (Dacinostat)           | 404951-53-7  | HDAC                        | S1095          | S109501 | 95.4      |
| BMS-754807                    | 1001350-96-4 | IGF-1R, Trk receptor, c-Met | S1124          | S112401 | 99.58     |
| CEP-18770 (Delanzomib)        | 847499-27-8  | Proteasome                  | S1157          | S115701 | 99.25     |
| BIB021                        | 848695-25-0  | HSP (e.g. HSP90)            | S1175          | S117501 | 99.54     |
| Dimesna                       | 16208-51-8   | Others                      | S1201          | S120101 | 100       |
| Ki16425                       | 355025-24-0  | LPA Receptor                | S1315          | S131501 | 91.73     |
| Tenofovir Disoproxil Fumarate | 202138-50-9  | Reverse Transcriptase       | S1400          | S140001 | 99.03     |
| Safinamide Mesylate           | 202825-46-5  | MAO                         | S1472          | S147201 | 99.85     |
| FG-4592                       | 808118-40-3  | HIF                         | S1007          | S100701 | 99.01     |
| Olaparib                      | 763113-22-0  | PARP                        | S1060          | S106003 | 99        |
| Quisinosat                    | 875320-29-9  | HDAC                        | S1096          | S109601 | 99.62     |
| SRT1720                       | 1001645-58-4 | Sirtuin                     | S1129          | S112901 | 99.3      |
| MK-8245                       | 1030612-90-8 | Dehydrogenase               | S1158          | S115801 | 99.1      |
| XAV-939                       | 284028-89-3  | Wnt/beta-catenin            | S1180          | S118001 | 99.17     |
| Doxorubicin (Adriamycin)      | 25316-40-9   | Autophagy, Topoisomerase    | S1208          | S120802 | 99.1      |
| Costunolide                   | 553-21-9     | Telomerase                  | S1319          | S131901 | 99.08     |
| Elaiophylin                   | 37318-06-2   | Others                      | S1448          | S144801 | 99.42     |
| Oligomycin A                  | 579-13-5     | ATPase                      | S1478          | S147801 | 97.33     |
| Panobinostat (LBH589)         | 404950-80-7  | HDAC                        | S1030          | S103002 | 97.17     |
| Nutlin-3                      | 890090-75-2  | E3 Ligase, Mdm2             | S1061          | S106101 | 97.64     |
| BTZ043 Racemate               | 957217-65-1  | Others                      | S1097          | S109702 | 99.14     |
| YM155                         | 781661-94-7  | Survivin                    | S1130          | S113001 | 99.38     |
| Ganetespib (STA-9090)         | 888216-25-9  | HSP (e.g. HSP90)            | S1159          | S115901 | 99.69     |
| Danoprevir (ITMN-191)         | 850876-88-9  | HCV Protease                | S1183          | S118301 | 95.4      |
| PFI-1 (PF-6405761)            | 1403764-72-6 | Epigenetic Reader Domain    | S1216          | S121601 | 99        |
| Dexamethasone (DHAP)          | 50-02-2      | Autophagy, IL Receptor      | S1322          | S132201 | 99.02     |
| Nanchangmycin                 | 65101-87-3   | Others                      | S1450          | S145001 | 92.77     |
| VX-222 (VCH-222, Lomibuvir)   | 1026785-59-0 | HCV Protease                | S1480          | S148001 | 99.66     |
| NVP-AEW541                    | 475489-16-8  | IGF-1R                      | S1034          | S103401 | 99.43     |
| AUY922 (NVP-AUY922)           | 747412-49-3  | HSP (e.g. HSP90)            | S1069          | S106902 | 95.06     |
| Rucaparib                     | 459868-92-9  | PARP                        | S1098          | S109802 | 99.63     |
| ADL5859 HCl                   | 850173-95-4  | Opioid Receptor             | S1139          | S113901 | 99.18     |
| PA-824                        | 187235-37-6  | Others                      | S1162          | S116201 | 99.91     |
| BIBR 1532                     | 321674-73-1  | Telomerase                  | S1186          | S118601 | 99.75     |
| Idarubicin HCl                | 57852-57-0   | Topoisomerase               | S1228          | S122801 | 99.06     |
| Ginkgolide B                  | 15291-77-7   | PAFR                        | S1343          | S134302 | 99.63     |
| Ispinesib (SB-715992)         | 336113-53-2  | Kinesin                     | S1452          | S145201 | 99.04     |
| Zosuquidar (LY335979)3HCl     | 167465-36-3  | P-gp                        | S1481          | S148101 | 99.14     |
| STF-62247                     | 315702-99-9  | Others                      | S1041          | S104101 | 99.68     |
| HA14-1                        | 65673-63-4   | Bcl-2                       | S1071          | S107102 | 97        |
| Varespladib (LY315920)        | 172732-68-2  | Phospholipase (e.g. PLA)    | S1110          | S111002 | 99.38     |
| Andarine                      | 401900-40-1  | Androgen Receptor           | S1140          | S114001 | 99.19     |
| AT13387                       | 912999-49-6  | HSP (e.g. HSP90)            | S1163          | S116301 | 99.01     |
| CUDC-101                      | 1012054-59-9 | HDAC, HER2, EGFR            | S1194          | S119401 | 99.02     |
| 2-Methoxyestradiol            | 362-07-2     | HIF                         | S1233          | S123301 | 99.31     |
| Losartan Potassium            | 124750-99-8  | RAAS                        | S1359          | S135901 | 99.39     |
| Tipifarnib                    | 192185-72-1  | Transferase                 | S1453          | S145301 | 96.3      |
| Daclatasvir (BMS-790052)      | 1009119-64-5 | HCV Protease                | S1482          | S148202 | 99.7      |

**Table S2-2. List of 320 chemical compounds (cont'd).**

| Compound ID               | CAS Number   | Targets                        | Selleck Cat No | Batch   | Purity, % |
|---------------------------|--------------|--------------------------------|----------------|---------|-----------|
| Trichostatin A (TSA)      | 58880-19-6   | HDAC                           | S1045          | S104502 | 99.33     |
| Belinostat (PXD101)       | 414864-00-9  | HDAC                           | S1085          | S108501 | 99.16     |
| Odanacatib (MK-0822)      | 603139-19-1  | Cathepsin K                    | S1115          | S111501 | 99.18     |
| 17-AAG (Tanespimycin)     | 75747-14-7   | HSP (e.g. HSP90)               | S1141          | S114101 | 99.6      |
| ABT-751 (E7010)           | 141430-65-1  | Microtubule Associated         | S1165          | S116501 | 99.23     |
| TAK-700 (Orteronel)       | 426219-18-3  | P450 (e.g. CYP17)              | S1195          | S119501 | 99.16     |
| Vinblastine               | 865-21-4     | Microtubule Associated         | S1248          | S124801 | 93.05     |
| Epothilone B              | 152044-54-7  | Microtubule Associated         | S1364          | S136401 | 99.22     |
| Cilomilast                | 153259-65-5  | PDE                            | S1455          | S145501 | 95.52     |
| MC1568                    | 852475-26-4  | HDAC                           | S1484          | S148401 | 95.04     |
| Elesclomol (STA-4783)     | 488832-69-5  | HSP (e.g. HSP90)               | S1052          | S105202 | 99.06     |
| Iniparib (BSI-201)        | 160003-66-7  | PARP                           | S1087          | S108701 | 99.59     |
| TW-37                     | 877877-35-5  | Bcl-2                          | S1121          | S112101 | 99.78     |
| Alvespimycin, HCl         | 467214-21-7  | HSP (e.g. HSP90)               | S1142          | S114201 | 99.72     |
| Serdemetan                | 881202-45-5  | p53, E3 Ligase                 | S1172          | S117201 | 99.03     |
| Exemestane                | 107868-30-4  | Aromatase                      | S1196          | S119601 | 99.31     |
| Avagacestat               | 1146699-66-2 | Gamma-secretase, Beta Amyloid  | S1262          | S126201 | 96.92     |
| BMS-707035                | 729607-74-3  | Integrase                      | S1366          | S136601 | 99.3      |
| Zibotentan (ZD4054)       | 186497-07-4  | Endothelin Receptor            | S1456          | S145601 | 99.15     |
| Alprostadil               | 745-65-3     | Others                         | S1508          | S150801 | 100       |
| Pracinostat (SB939)       | 929016-96-6  | HDAC                           | S1515          | S151501 | 99        |
| SB408124                  | 288150-92-5  | OX Receptor                    | S1545          | S154501 | 99.74     |
| Gemcitabine               | 95058-81-4   | Autophagy, DNA/RNA Synthesis   | S1714          | S171401 | 99.26     |
| Albendazole Oxide         | 54029-12-8   | Others                         | S1836          | S183601 | 99.73     |
| Adenine HCl               | 2922-28-3    | DNA/RNA Synthesis              | S1983          | S198301 | 99.1      |
| Imidapril HCl             | 89396-94-1   | RAAS                           | S2109          | S210901 | 99.23     |
| LY2608204                 | 1234703-40-2 | Others                         | S2155          | S215501 | 99.74     |
| SB505124                  | 694433-59-5  | TGF-beta/Smad                  | S2186          | S218601 | 99.25     |
| AR-42                     | 935881-37-1  | HDAC                           | S2244          | S224401 | 99.03     |
| Andrographolide           | 5508-58-7    | Others                         | S2261          | S226101 | 99.1      |
| Tosedostat (CHR2797)      | 238750-77-1  | Aminopeptidase                 | S1522          | S152201 | 83.58     |
| Dapagliflozin             | 461432-26-8  | SGLT                           | S1548          | S154803 | 96.52     |
| Terbinafine               | 91161-71-6   | Others                         | S1725          | S172501 | 100       |
| Chenodeoxycholic Acid     | 474-25-9     | Others                         | S1843          | S184301 | 99.3      |
| Fluticasone propionate    | 80474-14-2   | Others                         | S1992          | S199201 | 97.93     |
| Licofelone                | 156897-06-2  | COX                            | S2121          | S212101 | 95.02     |
| LY2886721                 | 1262036-50-9 | Others                         | S2156          | S215601 | 99.63     |
| Avasimibe                 | 166518-60-1  | P450 (e.g. CYP17)              | S2187          | S218701 | 97.84     |
| Abiraterone Acetate       | 154229-18-2  | P450 (e.g. CYP17)              | S2246          | S224601 | 99.64     |
| Artesunate                | 88495-63-0   | Others                         | S2265          | S226502 | 99.15     |
| MK-1775                   | 955365-80-7  | Wee1                           | S1525          | S152501 | 99.38     |
| VX-809 (Lumacaftor)       | 936727-05-8  | CFTR                           | S1565          | S156501 | 99.02     |
| Levonorgestrel            | 797-63-7     | Others                         | S1727          | S172701 | 100       |
| Talc                      | 14807-96-6   | Others                         | S1900          | NA      | NA        |
| PCI-34051                 | 950762-95-5  | HDAC                           | S2012          | S201201 | 99.01     |
| S- (+)-Rolipram           | 85416-73-5   | PDE                            | S2127          | S212701 | 100       |
| PD128907 HCl              | 112960-16-4  | Dopamine Receptor              | S2168          | S216801 | 99.44     |
| SGL-1776 free base        | 1025065-69-3 | Pim                            | S2198          | S219801 | 96.99     |
| (-)-Huperzine A (HupA)    | 102518-79-6  | GluR                           | S2251          | S225101 | 98.19     |
| Azomycin                  | 527-73-1     | Others                         | S2267          | S226701 | 99.99     |
| LY2811376                 | 1194044-20-6 | Beta Amyloid, Gamma-secretase  | S1528          | S152801 | 99.55     |
| Semagacestat (LY450139)   | 425386-60-3  | Gamma-secretase                | S1594          | S159401 | 97.66     |
| Suprofen                  | 40828-46-4   | Others                         | S1761          | S176101 | 99.25     |
| Amlodipine                | 88150-42-9   | Calcium Channel                | S1905          | S190501 | 95.65     |
| Benidipine HCl            | 91599-74-5   | Calcium Channel                | S2017          | S201701 | 99.64     |
| Bazedoxifene HCl          | 198480-56-7  | Estrogen/progesterone Receptor | S2128          | S212801 | 99.06     |
| Givinostat (ITF2357)      | 732302-99-7  | HDAC                           | S2170          | S217001 | 99.07     |
| Irinotecan HCl Trihydrate | 136572-09-3  | Topoisomerase                  | S2217          | S221701 | 99.45     |
| (+)-Usniacin              | 7562-61-0    | Others                         | S2252          | NA      | NA        |
| Baicalin                  | 21967-41-9   | Others                         | S2269          | NA      | NA        |
| Org 27569                 | 868273-06-7  | Cannabinoid Receptor           | S1534          | S153401 | 99.72     |
| Cefoperazone              | 62893-19-0   | Others                         | S1611          | S161101 | 99.71     |
| Quetiapine Fumarate       | 111974-72-2  | Dopamine Receptor              | S1763          | S176301 | 99        |
| Nystatin (Fungicidin)     | 1400-61-9    | Others                         | S1934          | NA      | NA        |
| Doxifluridine             | 3094-09-5    | Others                         | S2045          | S204502 | 99.73     |

**Table S2-3. List of 320 chemical compounds (cont'd).**

| Compound ID                 | CAS Number   | Targets                       | Selleck Cat No | Batch   | Purity, % |
|-----------------------------|--------------|-------------------------------|----------------|---------|-----------|
| Atropine                    | 5908-99-6    | AChR                          | S2130          | S213001 | 99.78     |
| AG-14361                    | 328543-09-5  | PARP                          | S2178          | S217801 | 99.13     |
| UK 383367                   | 348622-88-8  | Procollagen C Proteinase      | S2224          | S222402 | 99.92     |
| 3-Indolebutyric acid (IBA)  | 133-32-4     | Others                        | S2253          | S225301 | 99.23     |
| Bilobalide                  | 33570-04-6   | Others                        | S2276          | S227602 | 95.92     |
| DMXAA (Vadimezan)           | 117570-53-3  | VDA                           | S1537          | S153701 | 99.04     |
| Pilocaine                   | 721-50-6     | Others                        | S1619          | S161901 | 100       |
| Chlorprothixene             | 113-59-7     | Dopamine Receptor             | S1771          | S177101 | 97.25     |
| Cyclocytidine HCl           | 10212-25-6   | Others                        | S1973          | S197301 | 95.04     |
| Terazosin HCl               | 70024-40-7   | Adrenergic Receptor           | S2059          | S205901 | 99.38     |
| GSK1292263                  | 1032823-75-8 | GPR                           | S2149          | S214901 | 99.03     |
| MLN2238                     | 1072833-77-2 | Proteasome                    | S2180          | S218001 | 99.05     |
| VX-765                      | 273404-37-8  | Caspase                       | S2228          | S222801 | 91.06     |
| Esculin                     | 531-75-9     | Others                        | S2258          | S225801 | 97.38     |
| Dihydroartemisinin (DHA)    | 71939-50-9   | Others                        | S2290          | NA      | NA        |
| EX 527 (Selisistat)         | 49843-98-3   | Sirtuin                       | S1541          | S154101 | 94.54     |
| Loteprednol etabonate       | 82034-46-6   | Others                        | S1669          | S166901 | 100       |
| Oxytetracycline             | 79-57-2      | Others                        | S1773          | S177301 | 97        |
| Meglumine                   | 6284-40-8    | Others                        | S1974          | S197401 | 100       |
| Trimebutine                 | 39133-31-8   | Opioid Receptor               | S2085          | S208501 | 99.05     |
| Erismodegib                 | 956697-53-3  | Hedgehog/Smoothed             | S2151          | S215101 | 99.6      |
| MLN9708                     | 1201902-80-8 | Proteasome                    | S2181          | S218101 | 99.62     |
| LY2157299                   | 700874-72-2  | TGF-beta/Smad                 | S2230          | S223001 | 99        |
| Aloe-emodin                 | 481-72-1     | Others                        | S2259          | S225901 | 99.09     |
| Glycyrrhizic Acid           | 1405-86-3    | Others                        | S2302          | S230202 | 99.8      |
| AM1241                      | 444912-48-5  | Cannabinoid Receptor          | S1544          | S154401 | 99.73     |
| Lubiprostone                | 136790-76-6  | Others                        | S1675          | S167501 | 91.85     |
| Fenoprofen Calcium          | 34597-40-5   | Others                        | S1823          | S182301 | 99.01     |
| Methscopolamine             | 155-41-9     | AChR                          | S1978          | S197801 | 95.12     |
| Betaxolol                   | 659-18-7     | Adrenergic Receptor           | S2091          | S209101 | 96.01     |
| CGS 21680 HCl               | 124431-80-7  | 5-alpha Reductase             | S2153          | S215301 | 99.04     |
| SB743921                    | 940929-33-9  | Kinesin                       | S2182          | S218201 | 95.24     |
| Ketanserin                  | 74050-98-9   | 5-HT Receptor                 | S2232          | S223201 | 97.87     |
| Laetrile                    | 29883-15-6   | Others                        | S2260          | S226002 | 97.54     |
| Gramine                     | 87-52-5      | Others                        | S2304          | S230401 | 97.83     |
| Gynostemma Extract          | 80321-63-7   | Others                        | S2306          | NA      | NA        |
| Morin Hydrate               | 6202-27-3    | Others                        | S2325          | S232501 | 90.5      |
| (-)-Parthenolide            | 20554-84-1   | E3 Ligase                     | S2341          | S234102 | 99.7      |
| Tetrahydropapaverine HCl    | 6429-04-5    | Others                        | S2367          | NA      | NA        |
| Hematoxylin                 | 517-28-2     | Others                        | S2384          | NA      | NA        |
| Curcuminol                  | 4871-97-0    | Others                        | S2407          | S240702 | 99.01     |
| Equl                        | 531-95-3     | Estrogen/progestogen Receptor | S2450          | S245001 | 99.04     |
| Scopolamine HBr             | 114-49-8     | AChR                          | S2508          | S250802 | 99.08     |
| Ceftiofur HCl               | 103980-44-5  | Others                        | S2543          | S254301 | 95.68     |
| GSK256066                   | 801312-28-7  | PDE                           | S2620          | S262001 | 97.59     |
| Hyodeoxycholic acid (HDCA)  | 83-49-8      | Others                        | S2311          | S231102 | 95        |
| Myricitrin                  | 17912-87-7   | Others                        | S2327          | S232701 | 99.06     |
| Phlorizin                   | 60-81-1      | Others                        | S2343          | S234302 | 99.48     |
| Vanillylacetone             | 122-48-5     | Others                        | S2371          | NA      | NA        |
| Hordenine                   | 539-15-1     | Others                        | S2385          | S238501 | 97.44     |
| Astragaloside A             | 83207-58-3   | TGF-beta/Smad                 | S2415          | S241501 | 98.78     |
| Clindamycin HCl             | 21462-39-5   | Others                        | S2457          | S245701 | 97        |
| Spectinomycin HCl           | 21736-83-4   | Others                        | S2510          | S251002 | 99        |
| Scopine HCl                 | 85700-55-6   | Others                        | S2548          | NA      | NA        |
| CK-1827452                  | 873697-71-3  | ATPase                        | S2623          | S262301 | 99.66     |
| Kaempferol                  | 520-18-3     | Others                        | S2314          | S231401 | 99.21     |
| Neohesperidin               | 13241-33-3   | Others                        | S2332          | S233203 | 99.01     |
| Rutin                       | 153-18-4     | Others                        | S2350          | S235002 | 97.09     |
| 5-hydroxytryptophan (5-HTP) | 56-69-9      | Others                        | S2374          | S237401 | 99.67     |
| Lappaconite HBr             | 97792-45-5   | Others                        | S2387          | S238701 | 95.83     |
| 20-Hydroxyecdysone          | 5289-74-7    | Others                        | S2417          | S241701 | 99.25     |
| Hexestrol                   | 84-16-2      | Estrogen/progestogen Receptor | S2473          | S247301 | 99        |
| Vardenafil HCl Trihydrate   | 224785-90-4  | PDE                           | S2515          | S251501 | 99.45     |
| Sulbactam sodium            | 69388-84-7   | Others                        | S2551          | S255101 | 98.35     |
| Fostamatinib (R788)         | 901119-35-5  | Syk                           | S2625          | S262501 | 99.03     |

**Table S2-4. List of 320 chemical compounds (cont'd).**

| Compound ID                | CAS Number   | Targets                  | Selleck Cat No | Batch   | Purity, % |
|----------------------------|--------------|--------------------------|----------------|---------|-----------|
| L-(+)-Rhamnose Monohydrate | 10030-85-0   | Others                   | S2317          | NA      | NA        |
| Oleanolic Acid             | 508-02-1     | Others                   | S2334          | S233401 | 99.02     |
| Salinomycin                | 53003-10-4   | Others                   | S2352          | NA      | NA        |
| Butylscopolamine Bromide   | 149-64-4     | Others                   | S2378          | S237802 | 98.92     |
| Naringin Dihydrochalcone   | 18916-17-1   | Others                   | S2389          | NA      | NA        |
| Aloperine                  | 56293-29-9   | Others                   | S2420          | S242001 | 100       |
| Lincomycin HCl             | 859-18-7     | Others                   | S2479          | S247901 | 95.04     |
| Epinephrine Bitartrate     | 51-42-3      | Adrenergic Receptor      | S2521          | S252102 | 99.11     |
| Amoxicillin Sodium         | 34642-77-8   | Others                   | S2565          | S256501 | 99.11     |
| Tubastatin A HCl           | 1310693-92-5 | HDAC                     | S2627          | s262701 | 99.05     |
| Luteolin                   | 491-70-3     | PDE                      | S2320          | S232002 | 97.89     |
| Oridonin                   | 28957-04-2   | Others                   | S2335          | S233501 | 92.9      |
| Sclareol                   | 515-03-7     | Others                   | S2354          | S235402 | 95        |
| Dioscin                    | 19057-60-4   | Others                   | S2379          | S237902 | 97        |
| Sesamin                    | 607-80-7     | Others                   | S2392          | S239201 | 99.07     |
| Apocynin                   | 498-02-2     | Others                   | S2425          | S242501 | 99.81     |
| Manidipine 2HCl            | 89226-75-5   | Calcium Channel          | S2482          | S248201 | 99.09     |
| L-Adrenaline               | 51-43-4      | Adrenergic Receptor      | S2522          | S252201 | 96.7      |
| Pioglitazone               | 111025-46-8  | Others                   | S2590          | s259002 | 98.97     |
| PNU-120596                 | 501925-31-1  | AChR                     | S2629          | S262901 | 99.01     |
| Magnolol                   | 528-43-8     | Others                   | S2321          | S232101 | 99.35     |
| 6-Carboxyuracil            | 65-86-1      | Others                   | S2336          | S233601 | 99.8      |
| Sclareolide                | 564-20-5     | Others                   | S2355          | NA      | NA        |
| D-Mannitol                 | 69-65-8      | Others                   | S2381          | NA      | NA        |
| Dihydromyricetin           | 27200-12-0   | Others                   | S2399          | S239901 | 99.09     |
| Rotundine                  | 483-14-7     | Dopamine Receptor        | S2437          | S243701 | 99.36     |
| Olopatadine HCl            | 140462-76-6  | Histamine Receptor       | S2494          | NA      | NA        |
| Methacycline HCl           | 3963-95-9    | Others                   | S2527          | S252701 | 100       |
| Clindamycin palmitate HCl  | 25507-04-4   | Others                   | S2596          | S259601 | 99.96     |
| GW3965 HCl                 | 405911-17-3  | Liver X Receptor         | S2630          | S263001 | 99.02     |
| (+)-Matrine                | 519-02-8     | Opioid Receptor          | S2322          | S232201 | 99.34     |
| Osthole                    | 484-12-8     | Others                   | S2337          | S233701 | 99.01     |
| Silymarin                  | 65666-07-1   | Others                   | S2358          | NA      | NA        |
| Evodiamine                 | 518-17-2     | Others                   | S2382          | S238202 | 99.76     |
| Sodium Danshensu           | 67920-52-9   | Others,P450 (e.g. CYP17) | S2401          | S240101 | 97.58     |
| Synephrine HCl             | 5985-28-4    | Adrenergic Receptor      | S2438          | S243801 | 99.14     |
| Pancuronium dibromide      | 15500-66-0   | AChR                     | S2497          | S249702 | 99.97     |
| L-Ascorbyl 6-palmitate     | 137-66-6     | Others                   | S2532          | S253201 | 100       |
| DHEA                       | 53-43-0      | Androgen Receptor        | S2604          | S260401 | 100       |
| URB597                     | 546141-08-6  | FAAH                     | S2631          | S263101 | 99.73     |
| Methyl-Hesperidin          | 11013-97-1   | Others                   | S2323          | NA      | NA        |
| Oxymatrine                 | 16837-52-8   | Others                   | S2338          | S233801 | 99.52     |
| Tanshinone I               | 568-73-0     | Others                   | S2364          | S236402 | 95.97     |
| Gastrodin                  | 62499-27-8   | Others                   | S2383          | S238301 | 99.7      |
| Sophocarpine               | 6483-15-4    | Others                   | S2405          | S240502 | 99.8      |
| Guanosine                  | 118-00-3     | Others                   | S2439          | S243901 | 99.05     |
| Quinine HCl Dihydrate      | 6119-47-7    | Others                   | S2502          | S250201 | 99.98     |
| Isoconazole nitrate        | 24168-96-5   | Others                   | S2534          | S253401 | 100       |
| MG-132                     | 133407-82-6  | Proteasome               | S2619          | S261903 | 93.43     |
| BMS-378806                 | 357263-13-9  | gp120/CD4                | S2632          | S263201 | 99        |
| NPS-2143                   | 284035-33-2  | CaSR                     | S2633          | S263302 | 97.61     |
| PF-3845                    | 1196109-52-0 | FAAH                     | S2666          | S266601 | 99.09     |
| Resminostat                | 864814-88-0  | HDAC                     | S2693          | S269301 | 99.04     |
| JTC-801                    | 244218-51-7  | Opioid Receptor          | S2722          | S272201 | 99.05     |
| Dalcetrapib                | 211513-37-0  | CETP                     | S2772          | S277201 | 97.03     |
| A-803467                   | 944261-79-4  | Sodium Channel           | S2785          | S278501 | 99.05     |
| Sirtinol                   | 410536-97-9  | Sirtuin                  | S2804          | S280401 | 97        |
| ARN-509                    | 956104-40-8  | Androgen Receptor        | S2840          | S284001 | 99.29     |
| StemRegenin 1 (SR1)        | 1227633-49-9 | Others                   | S2858          | S285801 | 99.51     |
| Camostat Mesilate          | 59721-29-8   | Others                   | S2874          | S287401 | 99.79     |
| TAK-875                    | 1374598-80-7 | GPR                      | S2637          | S263702 | 97.63     |
| Dolutegravir               | 1051375-16-6 | Integrase                | S2667          | S266701 | 99.06     |
| XL335                      | 629664-81-9  | FXR                      | S2694          | S269401 | 99.27     |
| AZ 3146                    | 1124329-14-1 | Kinesin                  | S2731          | S273101 | 99.46     |
| SB705498                   | 501951-42-4  | TRPV                     | S2773          | S277301 | 99.9      |

**Table S2-5. List of 320 chemical compounds (cont'd).**

| Compound ID             | CAS Number   | Targets                             | Selleck Cat No | Batch   | Purity, % |
|-------------------------|--------------|-------------------------------------|----------------|---------|-----------|
| Laquinimod              | 248281-84-7  | Others                              | S2787          | S278701 | 99.26     |
| MPEP                    | 96206-92-7   | GluR                                | S2809          | S280901 | 99.16     |
| Cathepsin Inhibitor 1   | 225120-65-0  | Others                              | S2847          | S284701 | 99.87     |
| IEM 1754 dihydrobroMide | 162831-31-4  | GluR,5-HT Receptor                  | S2860          | S286001 | 100       |
| Prucalopride            | 179474-81-8  | 5-HT Receptor                       | S2875          | S287501 | 99.96     |
| SNX-2112 (PF-04928473)  | 908112-43-6  | HSP (e.g. HSP90)                    | S2639          | S263901 | 99.58     |
| A922500                 | 959122-11-3  | Transferase                         | S2674          | S267401 | 99.08     |
| RS-127445               | 199864-87-3  | 5-HT Receptor                       | S2698          | S269801 | 97.08     |
| Anacetrapib (MK-0859)   | 875446-37-0  | CETP                                | S2748          | S274801 | 99.38     |
| CPI-613                 | 95809-78-2   | Dehydrogenase                       | S2776          | S277601 | 98.55     |
| Istradefylline          | 155270-99-8  | Others                              | S2790          | S279001 | 98.65     |
| Ciproxifan              | 184025-18-1  | Histamine Receptor                  | S2813          | S281301 | 100       |
| BRL-54443               | 57477-39-1   | 5-HT Receptor                       | S2852          | S285201 | 99.05     |
| CTEP (RO4956371)        | 871362-31-1  | GluR                                | S2861          | S286101 | 99.04     |
| (-)-MK 801 Maleate      | 121917-57-5  | GluR                                | S2857          | S285701 | 99.83     |
| PF-04929113 (SNX-5422)  | 908115-27-5  | HSP (e.g. HSP90)                    | S2656          | S265601 | 97.43     |
| BRL-15572               | 193611-72-2  | 5-HT Receptor                       | S2677          | S267701 | 99.7      |
| CH5132799               | 1007207-67-1 | mTOR,PI3K                           | S2699          | S269901 | 99.03     |
| GW788388                | 452342-67-5  | TGF-beta/Smad                       | S2750          | S275001 | 99.02     |
| PF-5274857              | 1373615-35-0 | Hedgehog/Smoothened                 | S2777          | S277701 | 97.74     |
| Sotrastaurin            | 425637-18-9  | PKC                                 | S2791          | S279101 | 98.65     |
| CI994 (Tacedinaline)    | 112522-64-2  | HDAC                                | S2818          | S281801 | 99.74     |
| Carfilzomib (PR-171)    | 868540-17-4  | Proteasome                          | S2853          | S285301 | 94.38     |
| VU 0364770              | 61350-00-3   | GluR                                | S2862          | S286201 | 99.02     |
| Acesulfame Potassium    | 55589-62-3   | Others                              | S2884          | S288401 | 99.97     |
| PNU 200577              | 207679-81-0  | AChR                                | S2659          | S265901 | 99.01     |
| Flavopiridol HCl        | 131740-09-5  | CDK                                 | S2679          | S267901 | 99.07     |
| LY2109761               | 700874-71-1  | TGF-beta/Smad                       | S2704          | S270401 | 99.18     |
| CUDC-907                | 1339928-25-4 | PI3K,HDAC                           | S2759          | S275901 | 99.38     |
| GW842166X               | 666260-75-9  | Cannabinoid Receptor                | S2778          | S277801 | 99.09     |
| Torcetrapib             | 262352-17-0  | CETP                                | S2792          | S279202 | 99.46     |
| RG108                   | 48208-26-0   | Transferase,DNA Methyltransferase   | S2821          | S282101 | 99.69     |
| BML-190                 | 2854-32-2    | Cannabinoid Receptor                | S2854          | S285401 | 99.01     |
| ML130 (Nodinitib-1)     | 799264-47-4  | NOD1                                | S2863          | S286301 | 99.8      |
| A-205804                | 251992-66-2  | Others                              | S2885          | S288501 | 99.66     |
| MK-0752                 | 471905-41-6  | Gamma-secretase,Beta Amyloid        | S2660          | S266001 | 99.1      |
| KW-2478                 | 819812-04-9  | HSP (e.g. HSP90)                    | S2685          | S268501 | 99.01     |
| YO-01027                | 209984-56-5  | Gamma-secretase                     | S2711          | S271101 | 97.83     |
| Canagliflozin           | 842133-18-0  | SGLT                                | S2760          | S276001 | 99.82     |
| M344                    | 251456-60-7  | HDAC                                | S2779          | S277901 | 99.36     |
| VU 0357121              | 433967-28-3  | GluR                                | S2795          | S279501 | 99.47     |
| OC000459                | 851723-84-7  | GPR                                 | S2822          | S282201 | 99.36     |
| MRS 2578                | 711019-86-2  | P2 Receptor                         | S2855          | S285501 | 99.02     |
| VUF 10166               | 155584-74-0  | 5-HT Receptor                       | S2865          | S286501 | 99.77     |
| PJ34                    | 344458-19-1  | PARP                                | S2886          | S288601 | 99.05     |
| ICG-001                 | 780757-88-2  | Wnt/beta-catenin                    | S2662          | S266201 | 100       |
| R547                    | 741713-40-6  | CDK                                 | S2688          | S268801 | 100       |
| Geldanamycin            | 30562-34-6   | HSP (e.g. HSP90),Autophagy          | S2713          | S271302 | 97.62     |
| MK-2048                 | 869901-69-9  | Integrase                           | S2765          | S276501 | 99.01     |
| I-BET151 (GSK1210151A)  | 1300031-49-5 | Epigenetic Reader Domain            | S2780          | S278001 | 99.2      |
| Lonafarnib              | 193275-84-2  | Transferase                         | S2797          | S279701 | 99.48     |
| ML133 HCl               | 1222781-70-5 | Potassium Channel                   | S2825          | S282501 | 99.77     |
| SB271046                | 209481-20-9  | 5-HT Receptor                       | S2856          | S285601 | 99.06     |
| U-104                   | 178606-66-1  | Carbonic Anhydrase                  | S2866          | S286601 | 99.05     |
| VU 0361737              | 1161205-04-4 | GluR                                | S2892          | S289201 | 100       |
| Clinofibrate            | 30299-08-2   | RAAS                                | S2664          | S266401 | 99.68     |
| ADX-47273               | 851881-60-2  | GluR                                | S2690          | S269001 | 99.01     |
| LY411575                | 209984-57-6  | Gamma-secretase                     | S2714          | S271401 | 99.44     |
| TKI-258, Dilactic Acid  | 852433-84-2  | PDGFR,FGFR,c-Kit,FLT3,VEGFR         | S2769          | S276903 | 99.56     |
| GW4064                  | 278779-30-9  | FXR                                 | S2782          | S278202 | 99.52     |
| Galeterone              | 851983-85-2  | P450 (e.g. CYP17),Androgen Receptor | S2803          | S280301 | 99.03     |
| Clindamycin             | 18323-44-9   | Others                              | S2830          | S283050 | 100       |
| MK-801 (Dizocilpine)    | 77086-21-6   | GluR                                | S8227          | NA      | NA        |
| Alogliptin              | 850649-61-5  | DPP-4                               | S5365          | NA      | NA        |
| SB742457                | 607742-69-8  | 5-HT Receptor                       | S2894          | S289401 | 97.8      |

**S1. Characterization of non-B DNA structure formation by native PAGE and CD spectroscopy.** Native gel electrophoresis results showing folded mobilities under **A) Sodium cacodylate (NaC) and Tris + Mg<sup>2+</sup> buffers, B) Tris buffer alone (no Mg<sup>2+</sup>).** *M10=10-bp marker; M20=20-bp marker.* Samples in panel A were electrophoresed on a single gel containing 10 mM Mg<sup>2+</sup>, while samples in panel B were electrophoresed on a single gel in the absence of Mg<sup>2+</sup>. Circular dichroism (CD) spectroscopy results showing a negative peak in the 210-220 nm region indicates triplex formation under **C) NaC and Tris + Mg<sup>2+</sup> buffers, D) Tris, no Mg<sup>2+</sup> buffer.**

**A**

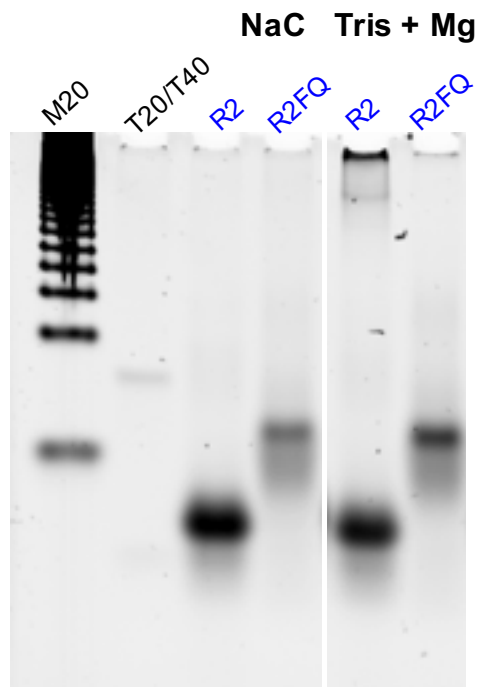

**B**

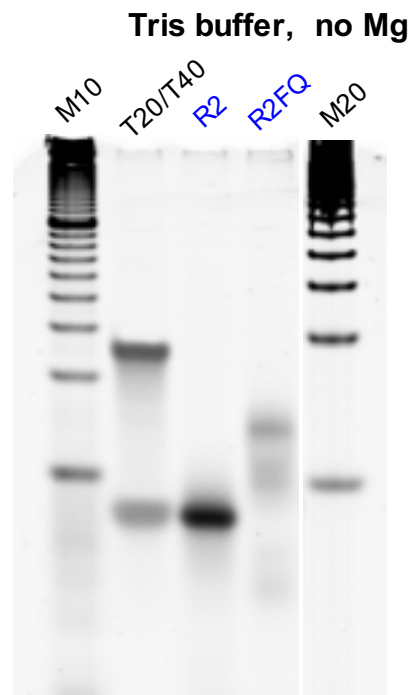

**C**

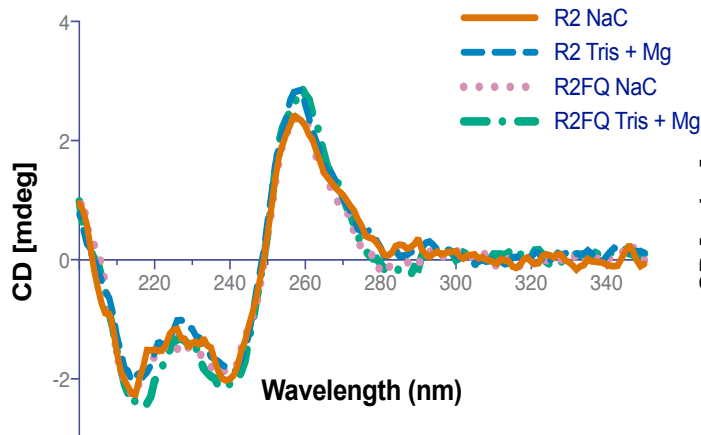

**D**

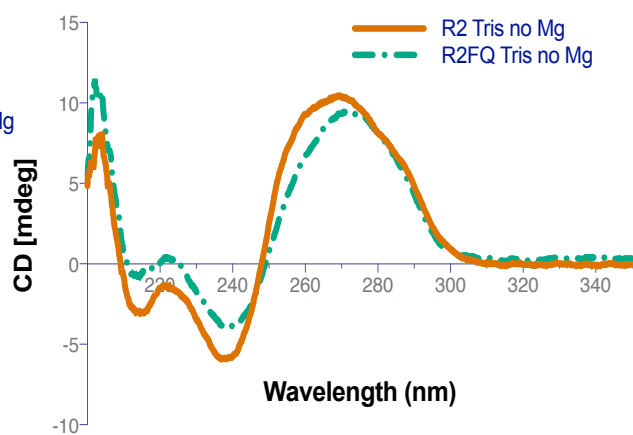

**S2. FAM fluorescence is not substantially quenched by the presence of ligands used.** Using Tris buffer, 5  $\mu\text{L}$  of 40 nM FAM solution was added to compounds in an assay plate ( $[\text{FAM}]_{\text{final}} = 20 \text{ nM}$ ) containing 5  $\mu\text{L}$  of 2x compound solution. Final  $[\text{Coralyne}]$  and  $[\text{BePI}] = 7.5 \mu\text{M}$ . Excitation: 495/13.5, Emission: 520/9.0

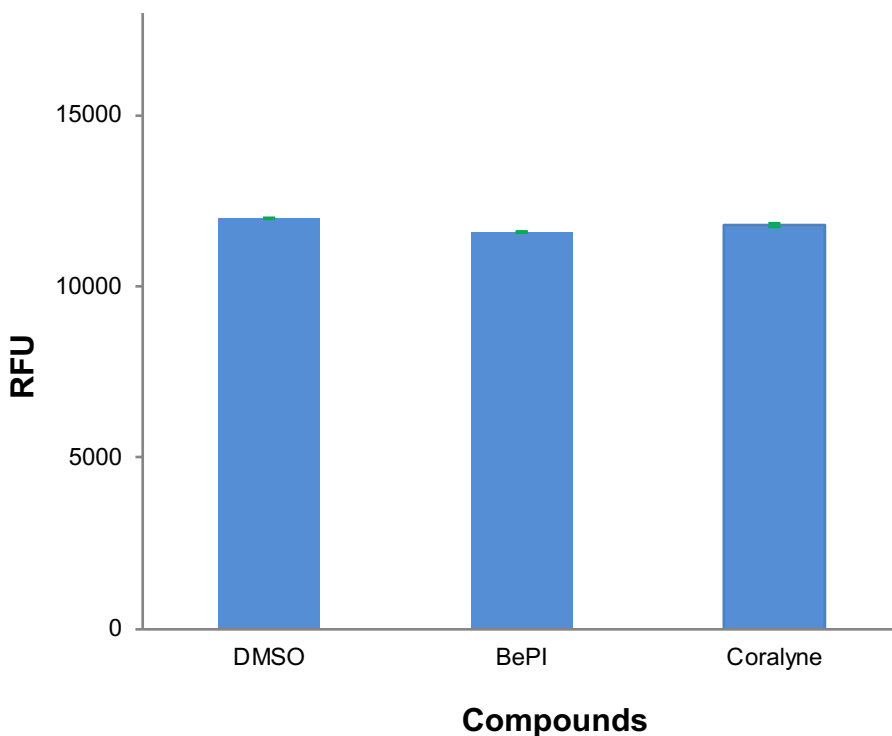



S3. Dose-dependent signal change in the presence of BePI in Tris buffer.

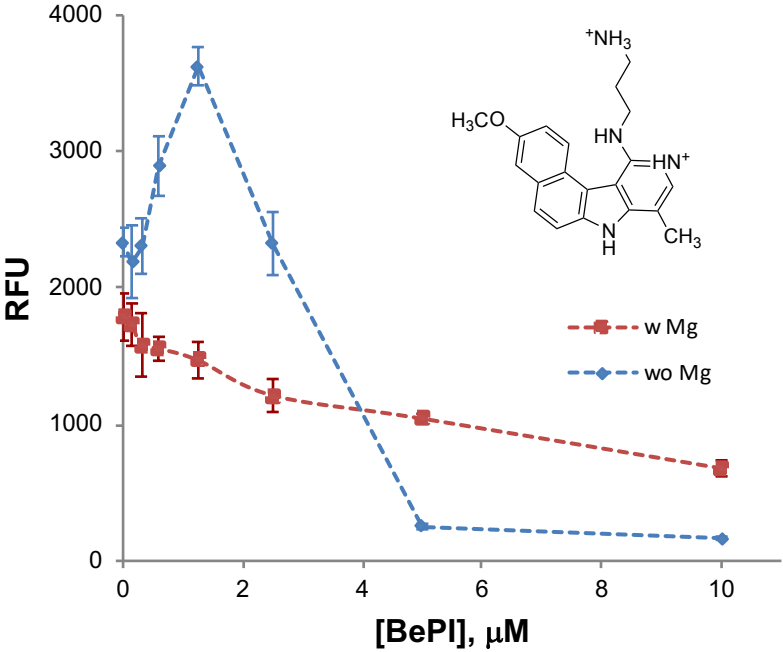

**S4. R2FQ assay with regard to A) tolerance to DMSO, and B) stability at room temperature in Tris buffer.**

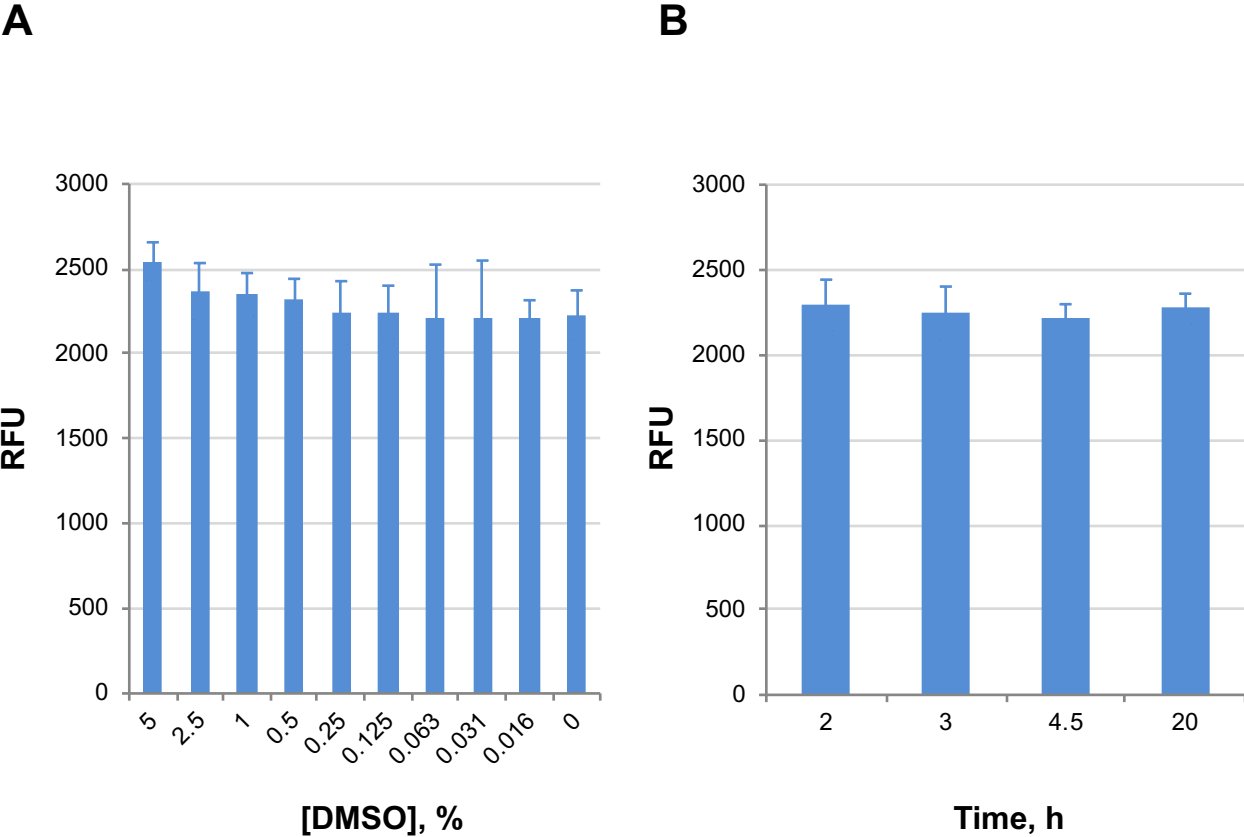

**S5. HPLC (A) and MS (B) data of Doxorubicin showing its purity over 99% and corresponding mass (M+H<sup>+</sup>) of m/z 544.**

**A**

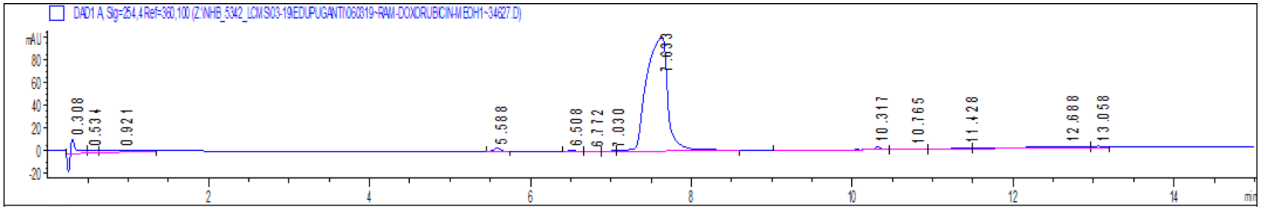

**B**

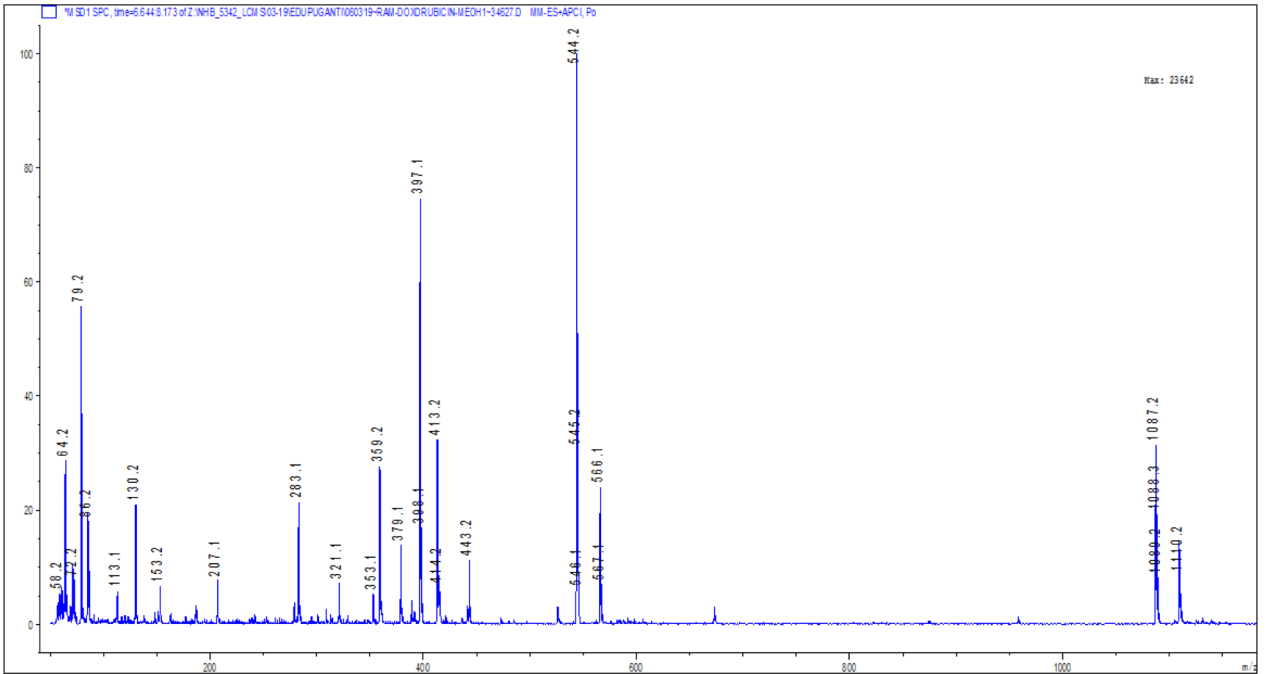

Supplement: gkz237_supplemental_file.pdf [file gkz237_supplemental_file.pdf]
